# Supplementary material for: Transcriptome Profiling Reveals the Effects of Nitric Oxide on the Growth and Physiological Characteristics of Watermelon under Aluminum Stress
Source: MDPI journal article supplement (doi:10.3390/genes12111735), 2021-10-29
Supplement: s1 [file s1]

**Table S1 Concentration of RNA and detection of RIN value.**

| Sample number | concentration (ng/ul) | volume (ul) | The total (ug) | Integrity value | Detection conclusion |
|---------------|-----------------------|-------------|----------------|-----------------|----------------------|
| CK-1          | 539                   | 35          | 18.865         | 6.8             | A                    |
| CK-2          | 918                   | 35          | 32.13          | 6.7             | A                    |
| CK-3          | 713                   | 35          | 24.955         | 6.8             | A                    |
| Al-1          | 834                   | 35          | 29.19          | 6.7             | A                    |
| Al-2          | 729                   | 35          | 25.515         | 6.8             | A                    |
| Al-3          | 793                   | 35          | 27.755         | 6.9             | A                    |
| Al+NO-1       | 692                   | 35          | 24.22          | 7               | A                    |
| Al+NO-2       | 1117                  | 35          | 39.095         | 7               | A                    |
| Al+NO-3       | 990                   | 35          | 34.65          | 7.1             | A                    |

**Table S2 Primers used in this experiment and their sequences.**

| Gene name   | Gene ID         | Forward Primer(5'-3')         | Reverse Primer(5'-3')        |
|-------------|-----------------|-------------------------------|------------------------------|
| SOD         | Cla97C10G187890 | TCAATCTCTTCCTCTCAGAACAAT<br>G | TGCTCAAGTCCACATCAACAC        |
| SOD[Mn]     | Cla97C03G050910 | TTCAATGGCGGAGGTCACA           | ATCAAGGCTTCAAGAGAACCAA       |
| SOD[Cu-Zn]2 | Cla97C04G071940 | CTTCCATATCCATTCTCTTGGTGAT     | CCAGTCGTCTTGCTAAGTTTCAT      |
| SOD[Cu-Zn]1 | Cla97C02G042100 | CGGTGATGATGGTACTGCTACT        | TGGTCAGGCTAAGTTCGGTTC        |
| POD2-1      | Cla97C01G005010 | AACGGCGATTGAACGACTTC          | CGAATGCGTCTGGAGTTGTC         |
| POD2-2      | Cla97C02G049950 | CAAGATGGTATAGTGAGCGAGTT       | AAGAGACGATGCCTGGACAA         |
| POD2-3      | Cla97C02G049940 | ACCGATCTTGTTGCCTTATCTG        | ACTTGGTCGCTGGTGAGAA          |
| POD2-4      | Cla97C02G049930 | CAATGGATGTGATGGCTCTGT         | CGCTATTCTACTGTCTCGTCTT       |
| CAT3        | Cla97C08G152180 | CGCCTTGGACCTAACTATCTTC        | TACGAACCGCTCTTGCCTAT         |
| CAT1        | Cla97C11G224830 | TCGTGTTGGAGGAAGTAATCATAG      | CAGGAATAATAATGGCAGGACAA      |
| NR1         | Cla97C11G221570 | ACTGGAGGTTGAGGTTCTTGA         | TTGATTGGCGTCGGTGGAT          |
| NR[NADH]    | Cla97C03G060420 | GTCGTTCTGCTCCTTCAAGTC         | TCCTCCTCCTCTGTTCTATCT        |
| NR[3]       | Cla97C03G060430 | AGACGACGCAATCCACCTAC          | TCCACCTCCACTGACCAGAA         |
| PAL-1       | Cla97C07G138620 | CAGAGGCACGGATAGTTATGGT        | CGTTGTGGTTCAAGAGATTAGCA      |
| PAL-2       | Cla97C04G075850 | ACTCGTCTGGCTATTGCTTCA         | AATATCAATGGCTTCGGCTGTT       |
| PAL-3       | Cla97C04G075820 | GGTTAGGTCCATTGATTGAAGTGA      | CCAGGCGAGTGTTGTCCAT          |
| 4CL         | Cla97C07G130540 | ATTGGCTACATACTGGAGACATTG      | AGTGTGCTTCCTGGCTTCTT         |
| CCR         | Cla97C10G195850 | ATGACTGCTGCCGCTGAAG           | TGCTGCTTGTTCTGCCATTGT        |
| POD55       | Cla97C11G214530 | ATCCGACCACTCCAGACACT          | GCTTCCTCATCGCCTCTACAA        |
| POD21       | Cla97C10G203590 | ACTCCATTGGCATTGATACTGAAG      | ATTCTTGATCCACTATGAGCAACC     |
| POD73       | Cla97C01G016570 | AGTCTCCTGTGCCGATATTCTC        | AGTGCGATCATGTCTTGTGTG        |
| PDON1       | Cla97C09G177290 | GCTTGTCTGGCATTGTATCT          | GTGAAGTTGAAGAGTCTGTAGTT<br>G |
| POD53       | Cla97C09G177060 | AGAACGGCTTGTGGTCATTC          | GAGGCCAACACTTCATCCAT         |
| CIYLS8      | Cla020175       | AGAACGGCTTGTGGTCATTC          | GAGGCCAACACTTCATCCAT         |

**Table S3 Transcriptome sequencing quality assessment.**

| sample  | raw_reads | clean_reads | Q20   | Q30   | GC_pct | total_map        |
|---------|-----------|-------------|-------|-------|--------|------------------|
| CK_1    | 44741680  | 42462940    | 97.52 | 92.87 | 45.34  | 41668916(97.24%) |
| CK_2    | 41150186  | 39328886    | 97.65 | 93.17 | 45.49  | 43233770(97.4%)  |
| CK_3    | 46118962  | 43694666    | 97.59 | 93.06 | 45.7   | 41404184(97.49%) |
| AI_1    | 45513698  | 42893180    | 97.72 | 93.34 | 45.54  | 41841950(97.55%) |
| AI_2    | 43501094  | 41127054    | 97.55 | 92.98 | 45.76  | 40005418(97.27%) |
| AI_3    | 41087334  | 38884134    | 97.59 | 93.03 | 45.95  | 37835260(97.3%)  |
| AI+NO_1 | 45603270  | 42850482    | 97.64 | 93.2  | 45.92  | 41315139(97.3%)  |
| AI+NO_2 | 46908270  | 44389830    | 97.52 | 92.92 | 45.6   | 38304143(97.39%) |
| AI+NO_3 | 45249970  | 42472336    | 97.74 | 93.35 | 45.57  | 42535403(97.35%) |

**Table S7 Transcriptional abundance of three antioxidant enzymes and NR genes.**

| Gene name   | Gene ID         | CK(FPKM) | Al(FPKM) | Al+NO(FPKM) |
|-------------|-----------------|----------|----------|-------------|
| SOD         | Cla97C10G187890 | 147.5843 | 202.8647 | 161.8484    |
| SOD[Mn]     | Cla97C03G050910 | 209.0378 | 219.7295 | 193.1981    |
| SOD[Cu-Zn]2 | Cla97C04G071940 | 61.81642 | 94.56039 | 83.89868    |
| SOD[Cu-Zn]1 | Cla97C02G042100 | 5.188983 | 7.134032 | 6.464014    |
| POD2-1      | Cla97C01G005010 | 0.565454 | 0.397759 | 0.835002    |
| POD2-2      | Cla97C02G049950 | 274.8846 | 93.72426 | 156.6937    |
| POD2-3      | Cla97C02G049940 | 779.7704 | 487.9261 | 665.3568    |
| POD2-4      | Cla97C02G049930 | 14.48687 | 25.99696 | 50.24186    |
| CAT3        | Cla97C08G152180 | 3963.484 | 5162.771 | 6082.668    |
| CAT1        | Cla97C11G224830 | 313.056  | 417.6664 | 506.8128    |
| NR1         | Cla97C11G221570 | 0.525555 | 0.318489 | 0.767888    |
| NR[NADH]    | Cla97C03G060420 | 1598.972 | 1198.411 | 1692.085    |
| NR[3]       | Cla97C03G060430 | 0.039596 | 0.060603 | 0.190951    |
